# Supplementary material for: Single Nucleotide Polymorphisms in the Vitamin D Metabolic Pathway and Their Relationship with High Blood Pressure Risk
Source: MDPI journal article supplement (doi:10.3390/ijms24065974), 2023-03-22
Supplement: s1 [file s1]

Table S5. Association of 13 SNPs with risk of HBP.

| SNP        | Gene    | Minor Allele | Major Allele | Model     | Cases     | Controls    | $\chi^2$ | p-value ( $\chi^2$ test) | p-value (FET) |
|------------|---------|--------------|--------------|-----------|-----------|-------------|----------|--------------------------|---------------|
| rs7041     | GC      | T            | G            | Genotypic | 44/122/76 | 114/252/120 | 4.841    | 0.08888                  | 0.09042       |
|            |         |              |              | Additive  | 210/274   | 480/492     | 4.802    | 0.02843                  | 0.02843       |
|            |         |              |              | Allelic   | 210/274   | 480/492     | 4.657    | 0.03093                  | 0.03423       |
|            |         |              |              | Dominant  | 166/76    | 366/120     | 3.701    | 0.05438                  | 0.06244       |
|            |         |              |              | Recessive | 44/198    | 114/372     | 2.645    | 0.1039                   | 0.106         |
| rs10741657 | CYP2R1  | A            | G            | Genotypic | 36/97/102 | 70/218/191  | 1.172    | 0.5565                   | 0.5583        |
|            |         |              |              | Additive  | 169/301   | 358/600     | 0.256    | 0.6125                   | 0.6125        |
|            |         |              |              | Allelic   | 169/301   | 358/600     | 0.270    | 0.6033                   | 0.6407        |
|            |         |              |              | Dominant  | 133/102   | 288/191     | 0.811    | 0.3676                   | 0.3743        |
|            |         |              |              | Recessive | 36/199    | 70/409      | 0.062    | 0.8033                   | 0.8231        |
| rs731236   | VDR     | C            | T            | Genotypic | 45/116/88 | 79/215/177  | 0.412    | 0.8136                   | 0.8143        |
|            |         |              |              | Additive  | 206/292   | 373/569     | 0.406    | 0.5239                   | 0.5239        |
|            |         |              |              | Allelic   | 206/292   | 373/569     | 0.424    | 0.515                    | 0.5344        |
|            |         |              |              | Dominant  | 161/88    | 294/177     | 0.350    | 0.5536                   | 0.5704        |
|            |         |              |              | Recessive | 45/204    | 79/392      | 0.192    | 0.6605                   | 0.6787        |
| rs7975232  | VDR     | C            | A            | Genotypic | 53/112/76 | 115/228/141 | 0.541    | 0.7628                   | 0.7608        |
|            |         |              |              | Additive  | 218/264   | 458/510     | 0.531    | 0.4658                   | 0.4658        |
|            |         |              |              | Allelic   | 218/264   | 458/510     | 0.562    | 0.4532                   | 0.4679        |
|            |         |              |              | Dominant  | 165/76    | 343/141     | 0.443    | 0.5057                   | 0.5469        |
|            |         |              |              | Recessive | 53/188    | 115/369     | 0.282    | 0.5949                   | 0.6408        |
| rs1544410  | VDR     | A            | G            | Genotypic | 49/106/88 | 94/220/177  | 0.139    | 0.9327                   | 0.9256        |
|            |         |              |              | Additive  | 204/282   | 408/574     | 0.022    | 0.8808                   | 0.8808        |
|            |         |              |              | Allelic   | 204/282   | 408/574     | 0.024    | 0.8758                   | 0.9104        |
|            |         |              |              | Dominant  | 155/88    | 314/177     | 0.001    | 0.965                    | 1             |
|            |         |              |              | Recessive | 49/194    | 94/397      | 0.107    | 0.7426                   | 0.7667        |
| rs2228570  | VDR     | T            | C            | Genotypic | 36/99/105 | 72/212/212  | 0.149    | 0.9281                   | 0.9361        |
|            |         |              |              | Additive  | 171/309   | 356/636     | 0.008    | 0.9246                   | 0.9246        |
|            |         |              |              | Allelic   | 171/309   | 356/636     | 0.009    | 0.9217                   | 0.9538        |
|            |         |              |              | Dominant  | 135/105   | 284/212     | 0.067    | 0.7957                   | 0.812         |
|            |         |              |              | Recessive | 36/204    | 72/424      | 0.030    | 0.8619                   | 0.9116        |
| rs11568820 | VDR     | A            | G            | Genotypic | 14/98/127 | 38/166/274  | 3.165    | 0.0755                   | 0.2106        |
|            |         |              |              | Additive  | 126/352   | 242/714     | 0.176    | 0.6743                   | 0.6743        |
|            |         |              |              | Allelic   | 126/352   | 242/714     | 0.182    | 0.669                    | 0.7005        |
|            |         |              |              | Dominant  | 112/127   | 204/274     | 1.132    | 0.2874                   | 0.3003        |
|            |         |              |              | Recessive | 14/225    | 38/440      | 1.037    | 0.3086                   | 0.3609        |
| rs4646536  | CYP27B1 | G            | A            | Genotypic | 14/88/139 | 40/172/268  | 1.482    | 0.4766                   | 0.5108        |
|            |         |              |              | Additive  | 116/366   | 252/708     | 0.765    | 0.3816                   | 0.3816        |
|            |         |              |              | Allelic   | 116/366   | 252/708     | 0.805    | 0.3696                   | 0.4053        |
|            |         |              |              | Dominant  | 102/139   | 212/268     | 0.221    | 0.6378                   | 0.6906        |
|            |         |              |              | Recessive | 14/227    | 40/440      | 1.475    | 0.2245                   | 0.2935        |
| rs3782130  | CYP27B1 | C            | G            | Genotypic | 33/85/114 | 48/144/217  | 1.250    | 0.5352                   | 0.5317        |
|            |         |              |              | Additive  | 151/313   | 240/578     | 1.238    | 0.2658                   | 0.2658        |
|            |         |              |              | Allelic   | 151/313   | 240/578     | 1.433    | 0.2313                   | 0.2313        |
|            |         |              |              | Dominant  | 118/114   | 192/217     | 0.910    | 0.3401                   | 0.366         |
|            |         |              |              | Recessive | 33/199    | 48/361      | 0.830    | 0.3622                   | 0.3874        |
| rs10877012 | CYP27B1 | T            | G            | Genotypic | 13/88/137 | 36/165/272  | 1.255    | 0.5338                   | 0.5546        |
|            |         |              |              | Additive  | 114/362   | 237/709     | 0.198    | 0.6557                   | 0.6557        |
|            |         |              |              | Allelic   | 114/362   | 237/709     | 0.207    | 0.6489                   | 0.6958        |
|            |         |              |              | Dominant  | 101/137   | 201/272     | 0.002    | 0.9883                   | 1             |
|            |         |              |              | Recessive | 13/225    | 36/437      | 1.139    | 0.2858                   | 0.3473        |
| rs703842   | CYP27B1 | C            | T            | Genotypic | 14/91/134 | 39/164/278  | 1.896    | 0.3875                   | 0.4059        |
|            |         |              |              | Additive  | 119/359   | 242/720     | 0.011    | 0.9168                   | 0.9168        |
|            |         |              |              | Allelic   | 119/359   | 242/720     | 0.011    | 0.9145                   | 0.9486        |
|            |         |              |              | Dominant  | 105/134   | 203/278     | 0.195    | 0.6587                   | 0.6895        |
|            |         |              |              | Recessive | 14/225    | 39/442      | 1.186    | 0.2762                   | 0.2939        |
| rs4809957  | CYP24A1 | G            | A            | Genotypic | 9/95/134  | 25/157/294  | 3.671    | 0.1595                   | 0.1637        |
|            |         |              |              | Additive  | 113/363   | 207/745     | 0.738    | 0.3903                   | 0.3903        |

|                                                                                                                                                                                                                                                                                                                                                                                       |         |   |   |           |          |           |       |        |        |
|---------------------------------------------------------------------------------------------------------------------------------------------------------------------------------------------------------------------------------------------------------------------------------------------------------------------------------------------------------------------------------------|---------|---|---|-----------|----------|-----------|-------|--------|--------|
|                                                                                                                                                                                                                                                                                                                                                                                       |         |   |   | Allelic   | 113/363  | 207/745   | 0.727 | 0.3939 | 0.4193 |
|                                                                                                                                                                                                                                                                                                                                                                                       |         |   |   | Dominant  | 104/134  | 182/294   | 1.972 | 0.1603 | 0.169  |
|                                                                                                                                                                                                                                                                                                                                                                                       |         |   |   | Recessive | 9/229    | 25/451    | 0.756 | 0.3844 | 0.4586 |
| rs6068816                                                                                                                                                                                                                                                                                                                                                                             | CYP24A1 | T | C | Genotypic | 4/45/192 | 11/84/381 | NA    | NA     | 0.8529 |
|                                                                                                                                                                                                                                                                                                                                                                                       |         |   |   | Additive  | 53/429   | 106/846   | 0.005 | 0.9396 | 0.9396 |
|                                                                                                                                                                                                                                                                                                                                                                                       |         |   |   | Allelic   | 53/429   | 106/846   | 0.006 | 0.9371 | 1      |
|                                                                                                                                                                                                                                                                                                                                                                                       |         |   |   | Dominant  | 49/192   | 95/381    | NA    | NA     | 0.9216 |
|                                                                                                                                                                                                                                                                                                                                                                                       |         |   |   | Recessive | 4/237    | 11/465    | NA    | NA     | 0.7835 |
| For Additive Model and Allelic Model, the counts shown in "Cases" and "Controls" are allele counts, not genotype counts, and for Genotypic Model, Dominant Model, and Recessive Model, the counts shown in "Cases" and "Controls" are genotype counts. Chr: Chromosome; FET: Fisher's exact test; HBP: High Blood Pressure; NA: Not Applicable; a: p-value for Bonferroni correction. |         |   |   |           |          |           |       |        |        |
