# Supplementary material for: Single Nucleotide Polymorphisms in the Vitamin D Metabolic Pathway and Their Relationship with High Blood Pressure Risk
Source: MDPI journal article supplement (doi:10.3390/ijms24065974), 2023-03-22
Supplement: s1 [file s1]

Table S3. Minor allele frequency of 13 SNPs in the whole population.

| Chr                                                                                | SNP        | Gene           | Minor Allele | Major Allele | MAF    |
|------------------------------------------------------------------------------------|------------|----------------|--------------|--------------|--------|
| 4                                                                                  | rs7041     | <i>GC</i>      | T            | G            | 0.4739 |
| 11                                                                                 | rs10741657 | <i>CYP2R1</i>  | A            | G            | 0.369  |
| 12                                                                                 | rs731236   | <i>VDR</i>     | C            | T            | 0.4021 |
| 12                                                                                 | rs7975232  | <i>VDR</i>     | C            | A            | 0.4662 |
| 12                                                                                 | rs1544410  | <i>VDR</i>     | A            | G            | 0.4169 |
| 12                                                                                 | rs2228570  | <i>VDR</i>     | T            | C            | 0.358  |
| 12                                                                                 | rs11568820 | <i>VDR</i>     | A            | G            | 0.2566 |
| 12                                                                                 | rs4646536  | <i>CYP27B1</i> | G            | A            | 0.2552 |
| 12                                                                                 | rs3782130  | <i>CYP27B1</i> | C            | G            | 0.305  |
| 12                                                                                 | rs10877012 | <i>CYP27B1</i> | T            | G            | 0.2468 |
| 12                                                                                 | rs703842   | <i>CYP27B1</i> | C            | T            | 0.2507 |
| 20                                                                                 | rs4809957  | <i>CYP24A1</i> | G            | A            | 0.2241 |
| 20                                                                                 | rs6068816  | <i>CYP24A1</i> | T            | C            | 0.1109 |
| Chr: Chromosome; MAF: Minor Allele Frequency; SNP: Single Nucleotide Polymorphism. |            |                |              |              |        |
