# Supplementary material for: Single Nucleotide Polymorphisms in the Vitamin D Metabolic Pathway and Their Relationship with High Blood Pressure Risk
Source: MDPI journal article supplement (doi:10.3390/ijms24065974), 2023-03-22
Supplement: s1 [file s1]

Table S2. Linkage disequilibrium test results in the whole population.

| Chr                                                   | Position<br>(base pair) | SNP1       | Gene    | Chr | Position<br>(base pair) | SNP2       | Gene    | R <sup>2</sup> | D'       |
|-------------------------------------------------------|-------------------------|------------|---------|-----|-------------------------|------------|---------|----------------|----------|
| 12                                                    | 47844974                | rs731236   | VDR     | 12  | 47845054                | rs7975232  | VDR     | 0.52241        | 0.971043 |
| 12                                                    | 47844974                | rs731236   | VDR     | 12  | 47846052                | rs1544410  | VDR     | 0.67492        | 0.898375 |
| 12                                                    | 47845054                | rs7975232  | VDR     | 12  | 47846052                | rs1544410  | VDR     | 0.438847       | 0.838338 |
| 12                                                    | 57764205                | rs4646536  | CYP27B1 | 12  | 57768115                | rs3782130  | CYP27B1 | 0.410515       | 0.853081 |
| 12                                                    | 57764205                | rs4646536  | CYP27B1 | 12  | 57768302                | rs10877012 | CYP27B1 | 0.731762       | 0.905063 |
| 12                                                    | 57764205                | rs4646536  | CYP27B1 | 12  | 57768956                | rs703842   | CYP27B1 | 0.747667       | 0.89186  |
| 12                                                    | 57768115                | rs3782130  | CYP27B1 | 12  | 57768302                | rs10877012 | CYP27B1 | 0.386295       | 0.854472 |
| 12                                                    | 57768115                | rs3782130  | CYP27B1 | 12  | 57768956                | rs703842   | CYP27B1 | 0.37292        | 0.836158 |
| 12                                                    | 57768302                | rs10877012 | CYP27B1 | 12  | 57768956                | rs703842   | CYP27B1 | 0.758471       | 0.904393 |
| Chr: Chromosome; SNP: Single Nucleotide Polymorphism. |                         |            |         |     |                         |            |         |                |          |
